# Supplementary material for: Forces during cellular uptake of viruses and nanoparticles at the ventral side
Source: PubMed Central journal article supplement (PMC6940367; doi:10.1038/s41467-019-13877-w), 2020-01-02
Supplement: 41467_2019_13877_MOESM14_ESM.pdf [file 41467_2019_13877_MOESM14_ESM.pdf]

**Title: Movie 1: Titin-based molecular tension sensors detects forces on single virus exerted by the ventral cell side.**

**Description:** TIRF movie of tension sensors (Alexa647-I27-RGE), virus particles (reovirus-Alexa568) and AP2-GFP signal of a BSC1 cell spreading on the tension sensor surface (grouped z-project à 3 slides, all channels with inverted LUT). Scale bar, 10  $\mu\text{m}$ .

**Title: Movie 2: Tearing off biotin-neutravidin immobilized virus particles by U373 cells is independent of matrix metalloproteinases.**

**Description:** Confocal time-lapse movie of U373 cells (transmission, left) spreading on a surface with biotin-neutravidin immobilized reovirus particles (Alexa647, right, inverted LUT). After 30 min the matrix metalloproteinase inhibitor GM6001 was added at 25  $\mu\text{M}$ . Scale bar, 10  $\mu\text{m}$ .

**Title: Movie 3: Tearing off biotin-neutravidin immobilized virus particles by HeLa cells.**

**Description:** Confocal time-lapse of HeLa cells (transmission) tearing off biotin-neutravidin immobilized reovirus particles (Alexa647, inverted LUT). Scale bar, 10  $\mu\text{m}$ .

**Title: Movie 4: Tearing off biotin-neutravidin immobilized particles by HeLa cells shows spatial preference underneath cell periphery.**

**Description:** Interference reflection microscopy time-lapse of HeLa cells (dark interference) tearing off biotin-neutravidin immobilized AuNPs (bright due to scattering). Scale bar, 10  $\mu\text{m}$ .

**Title: Movie 5: Tearing off biotin-neutravidin immobilized AuNPs by HeLa cells.**

**Description:** Confocal time-lapse of HeLa cells (transmission) tearing off biotin-neutravidin immobilized AuNPs (StarRed, inverted LUT). Scale bar, 10  $\mu\text{m}$ .

**Title: Movie 6: Tearing off biotin-neutravidin immobilized AuNPs with cRGD ligands by HeLa cells.**

**Description:** Confocal time-lapse of HeLa cells (transmission) tearing off biotin-neutravidin immobilized AuNPs with cRGD ligands (StarRed, inverted LUT). Scale bar, 10  $\mu\text{m}$ .

**Title: Movie 7: Tearing off biotin-neutravidin immobilized AuNPs with  $\alpha_5\beta_1$ -selective ligands by HeLa cells.**

**Description:** Confocal time-lapse of HeLa cells (transmission) tearing off biotin-neutravidin immobilized AuNPs with  $\alpha_5\beta_1$ -selective ligands (StarRed, inverted LUT). Scale bar, 10  $\mu\text{m}$ .

**Title: Movie 8: Tearing off biotin-neutravidin immobilized AuNPs by HeLa cells with inhibition of actin polymerization by cytochalasin D.**

**Description:** Confocal time-lapse of HeLa cells (transmission) tearing off biotin-neutravidin immobilized AuNPs (StarRed, inverted LUT). 1 h after seeding the cells actin polymerization inhibitor cytochalasin D was added at 60 nM final concentration. Scale bar, 10  $\mu\text{m}$ .

**Title: Movie 9: Tearing off biotin-neutravidin immobilized AuNPs by HeLa cells with inhibition of actin polymerization by latrunculin A.**

**Description:** Confocal time-lapse of HeLa cells (transmission) tearing off biotin-neutravidin immobilized AuNPs (StarRed, inverted LUT). 1 h after seeding the cells actin polymerization inhibitor latrunculin A was added at 100 nM final concentration. Scale bar, 10  $\mu\text{m}$ .

**Title: Movie 10: Tearing off biotin-neutravidin immobilized AuNPs by HeLa cells with inhibition of ROCK by Y-27632.**

**Description:** Confocal time-lapse of HeLa cells (transmission) tearing off biotin-neutravidin immobilized AuNPs (StarRed, inverted LUT). 1 h after seeding the cells ROCK inhibitor Y-27632 was added at 20  $\mu\text{M}$  final concentration. Scale bar, 10  $\mu\text{m}$ .
